# Supplementary material for: Clostridium butyricum and Its Culture Supernatant Alleviate the Escherichia coli-Induced Endometritis in Mice
Source: MDPI journal article supplement (doi:10.3390/ani12192719), 2022-10-10
Supplement: s1 [file s1]

Table S1. The score criterion of uterine injury score

| Endometrial injury |       | Inflammatory infiltrate |       | Uterine oedema |       | Endometrium thickness |       |
|--------------------|-------|-------------------------|-------|----------------|-------|-----------------------|-------|
| Grade              | Score | Grade                   | Score | Grade          | Score | Grade                 | Score |
| Normal             | 0     | Normal                  | 0     | Normal         | 0     | Normal                | 0     |
| +                  | 1     | +                       | 1     | +              | 1     | +                     | 1     |
| ++                 | 2     | ++                      | 2     | ++             | 2     | ++                    | 2     |
| +++                | 3     | +++                     | 3     | +++            | 3     | +++                   | 3     |

Note: “+” was represented as the degree of uterine injury.

Table S2. Body temperature

| Individual number | CON   |       | ECO   |       | AMP   |       | VCB   |       | SCB   |       |
|-------------------|-------|-------|-------|-------|-------|-------|-------|-------|-------|-------|
|                   | day 1 | day 6 |
| 1                 | 37.9  | 37.5  | 38.6  | 37.4  | 37.7  | 37.5  | 38    | 37.7  | 38.3  | 38.2  |
| 2                 | 38.6  | 38.8  | 38.2  | 36.5  | 38.2  | 38.3  | 38.1  | 38.4  | 38.5  | 38.4  |
| 3                 | 38.4  | 38.6  | 38.1  | 36.8  | 38.4  | 38.2  | 38.5  | 38.8  | 38.2  | 38.7  |
| 4                 | 38.7  | 38.5  | 37.8  | 35.5  | 38.7  | 38.1  | 38.6  | 37.9  | 38.6  | 38    |
| 5                 | 38.3  | 38.7  | 38.5  | 35.6  | 38.3  | 38.7  | 38.2  | 38.7  | 37.8  | 38.1  |
| 6                 | 38.1  | 38.3  | 38.4  | 37.1  | 37.9  | 38.2  | 37.8  | 37.5  | 38.4  | 37.7  |

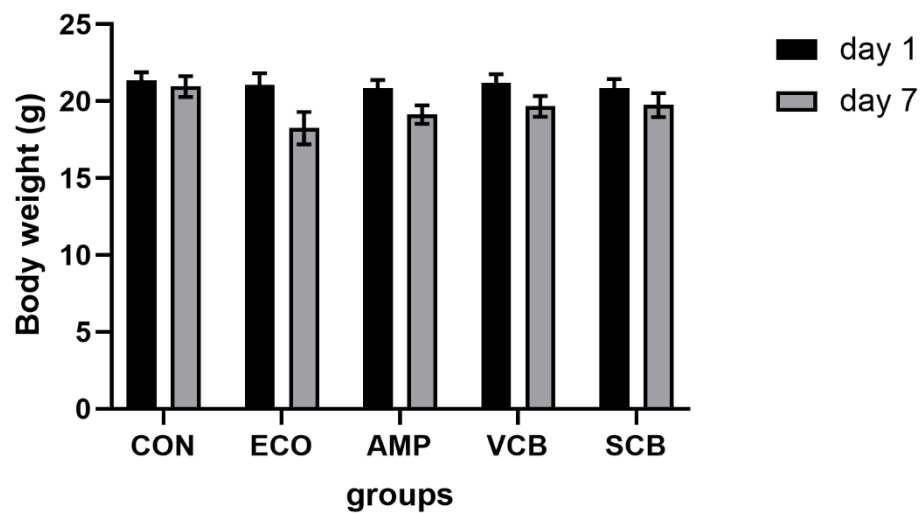

Figure S1. Comparison of body weight of mice before and after the experiment.

Table S3. Pregnancy rate

| group                          | CON | ECO | AMP  | VCB  | SCB  |
|--------------------------------|-----|-----|------|------|------|
| Total number of female mice    | 6   | 6   | 6    | 6    | 6    |
| Number of pregnant female mice | 6   | 0   | 2    | 4    | 5    |
| pregnancy rate (%)             | 100 | 0   | 33.3 | 66.6 | 83.3 |

Table S4. Pups per litter

| group           | CON | ECO | AMP | VCB | SCB |
|-----------------|-----|-----|-----|-----|-----|
| pups per litter | 6   |     | 6   | 5   | 6   |
|                 | 7   |     | 5   | 7   | 6   |
|                 | 6   |     |     | 6   | 6   |
|                 | 8   |     |     | 6   | 7   |
|                 | 8   |     |     |     | 5   |
|                 | 7   |     |     |     |     |

Table S5. Weight per pup

| group             | CON | ECO | AMP | VCB  | SCB |
|-------------------|-----|-----|-----|------|-----|
| weight of pup (g) | 1.6 |     | 1.4 | 1.4  | 1.3 |
|                   | 1.4 |     | 1.6 | 1.65 | 1.4 |
|                   | 1.5 |     | 1   | 1.44 | 1.5 |
|                   | 1.7 |     | 1.5 | 1.33 | 1.4 |
|                   | 1.5 |     | 1.6 | 1.33 | 1.3 |
|                   | 1.6 |     | 1.4 | 1.53 | 1.4 |
|                   | 1.6 |     | 1.4 | 1.2  | 1.5 |
|                   | 1.7 |     | 1.3 | 1.6  | 1.3 |
|                   | 1.5 |     | 1.5 | 1.2  | 1.5 |
|                   | 1.5 |     | 1.3 | 1.3  | 1.5 |
|                   | 1.5 |     | 1.4 | 1.5  | 1.5 |
|                   | 1.4 |     |     | 1.4  | 1.6 |
|                   | 1.6 |     |     | 1.6  | 1.5 |
|                   | 1.6 |     |     | 1.5  | 1.5 |
|                   | 1.7 |     |     | 1.5  | 1.3 |
|                   | 1.5 |     |     | 1.4  | 1.2 |
|                   | 1.4 |     |     | 1.3  | 1.5 |
|                   | 1.6 |     |     | 1.4  | 1.4 |
|                   | 1.5 |     |     | 1.6  | 1.5 |
|                   | 1.5 |     |     | 1.4  | 1.6 |
|                   | 1.6 |     |     | 1.4  | 1.4 |
|                   | 1.4 |     |     | 1.3  | 1.6 |
|                   | 1.7 |     |     | 1.5  | 1.4 |
|                   | 1.5 |     |     | 1.4  | 1.5 |
|                   | 1.6 |     |     | 1.5  | 1.2 |
|                   | 1.6 |     |     |      | 1.5 |
|                   | 1.5 |     |     |      | 1.4 |
|                   | 1.5 |     |     |      | 1.6 |
|                   | 1.6 |     |     |      | 1.4 |
|                   | 1.4 |     |     |      | 1.5 |
|                   | 1.3 |     |     |      |     |
|                   | 1.5 |     |     |      |     |
|                   | 1.6 |     |     |      |     |
|                   | 1.3 |     |     |      |     |
|                   | 1.5 |     |     |      |     |
|                   | 1.7 |     |     |      |     |
|                   | 1.6 |     |     |      |     |
|                   | 1.5 |     |     |      |     |
|                   | 1.6 |     |     |      |     |
|                   | 1.3 |     |     |      |     |
|                   | 1.2 |     |     |      |     |

|  |     |  |  |  |  |
|--|-----|--|--|--|--|
|  | 1.6 |  |  |  |  |
|--|-----|--|--|--|--|
